# Supplementary material
Source: PubMed Central journal article supplement (PMC3127583)
Supplement: NIHMS304535-supplement-Supplement.pdf [file NIHMS304535-supplement-Supplement.pdf]

# A Bioinformatics Approach for Biomarker Identification in Radiation-Induced Lung Inflammation from Limited Proteomics Data

Jung Hun Oh, Jeffrey M. Craft, Reid Townsend, Joseph O. Deasy, Jeffrey D. Bradley, and Issam El Naqa

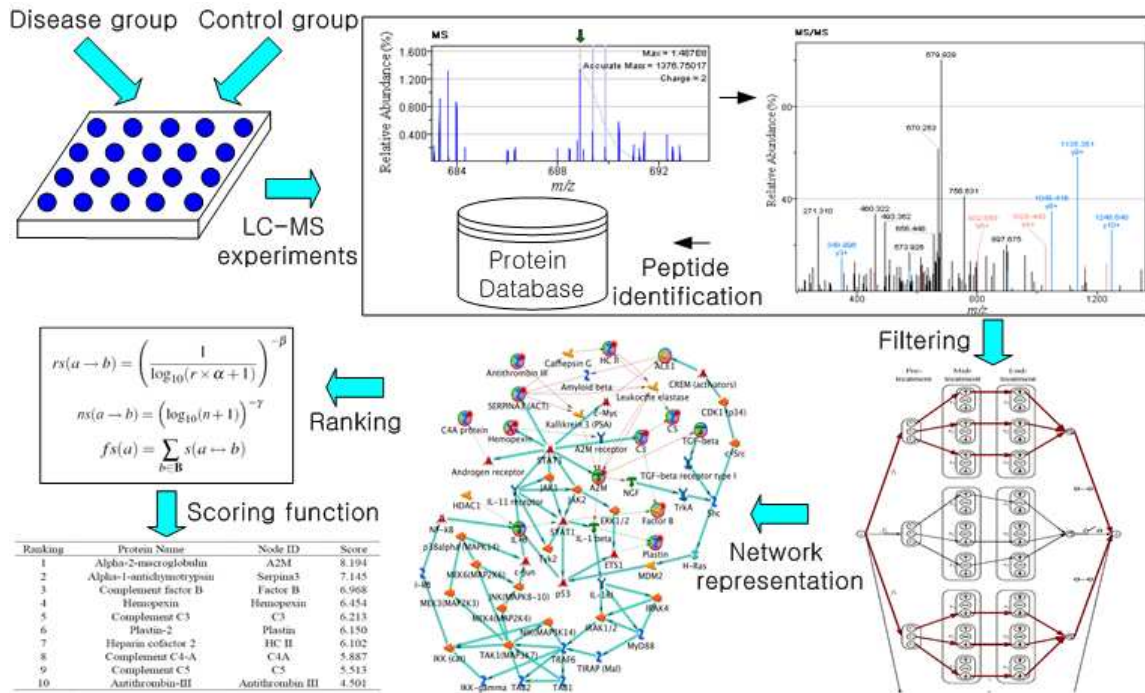

Widespread utilization of proteomics analysis for biomarkers discovery in oncology is impeded by prohibitive sample size requirements. In this work, we propose a novel graph-based scoring function to rank and identify the most robust biomarkers from limited proteomics data. The methodology is demonstrated for identifying biomarkers for radiation pneumonitis in lung cancer patients. Our preliminary results suggest that the proposed approach is promising for biomarker identification in sample-limited clinical applications.
